# Supplementary material
Source: PubMed Central journal article supplement (PMC2955323)
Supplement: NIHMS237745-supplement-02.pdf [file NIHMS237745-supplement-02.pdf]

**A**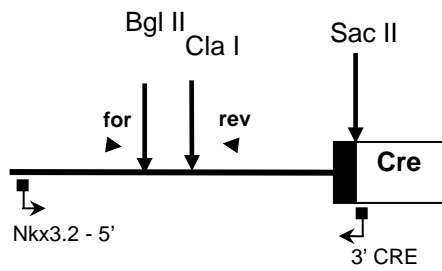**B**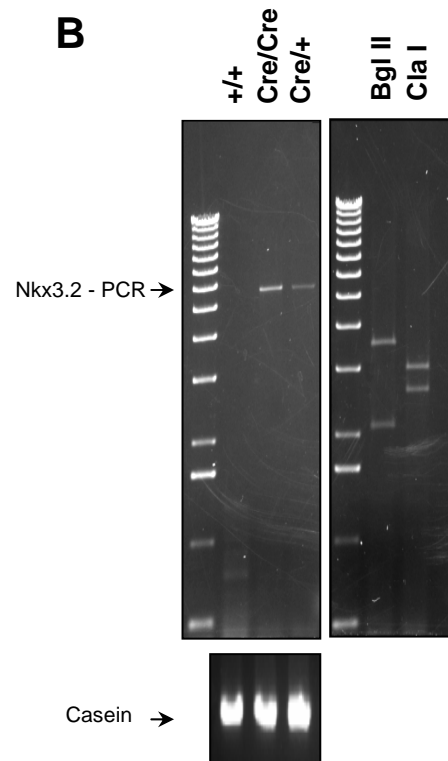**C**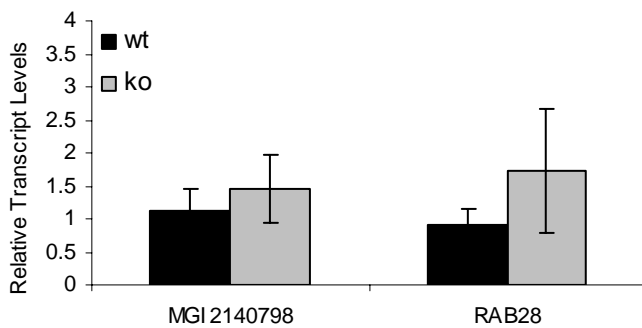

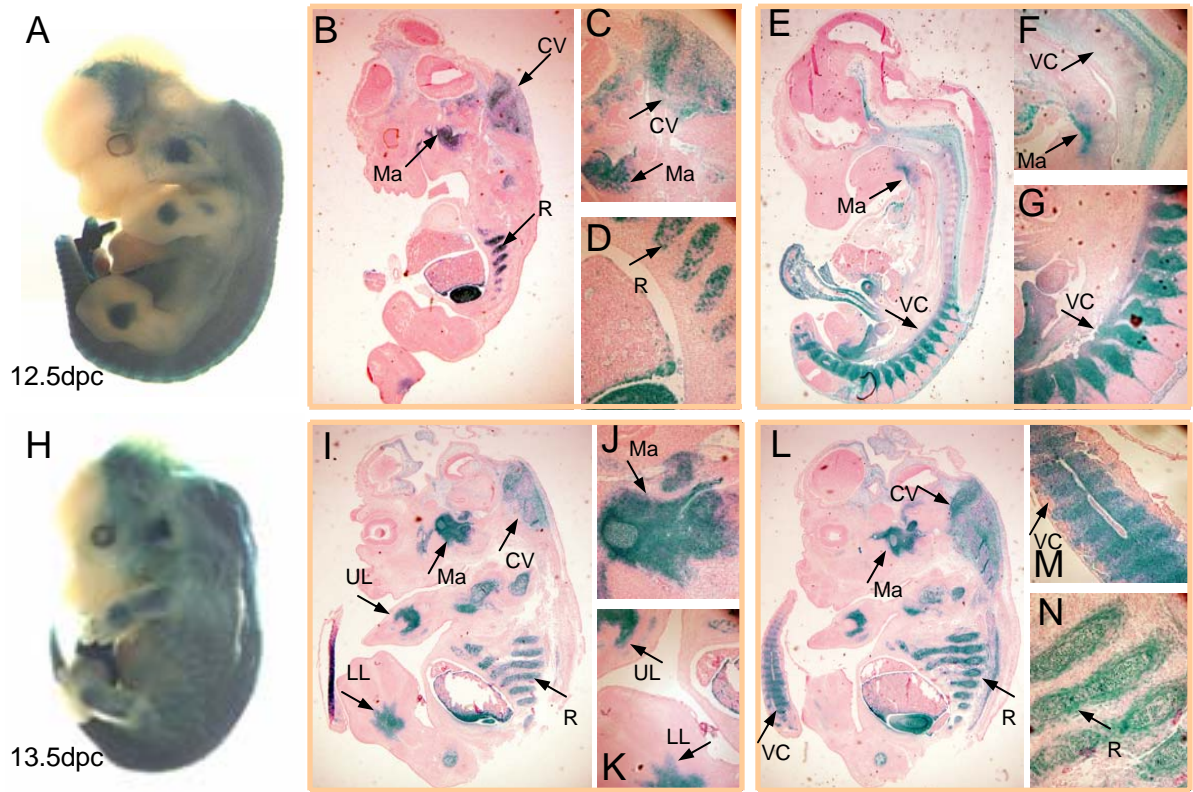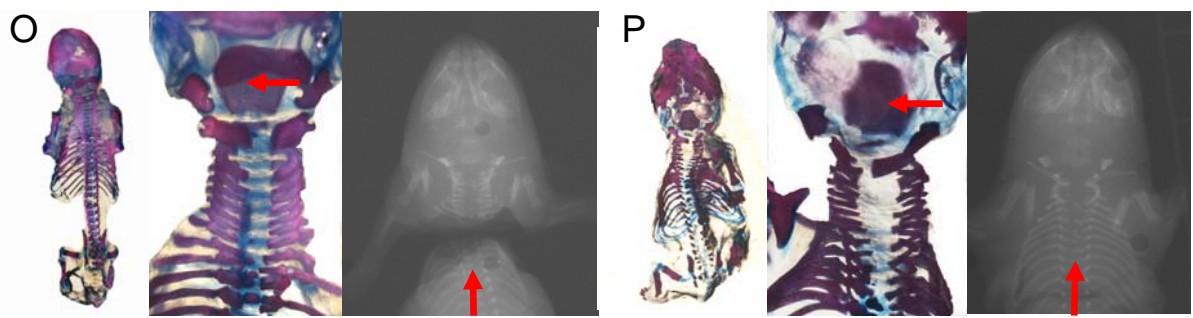

*Wild type*

*Bapx1cre/cre*

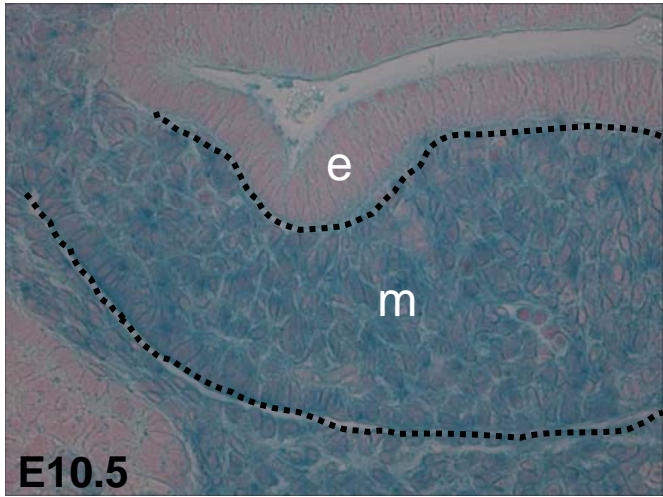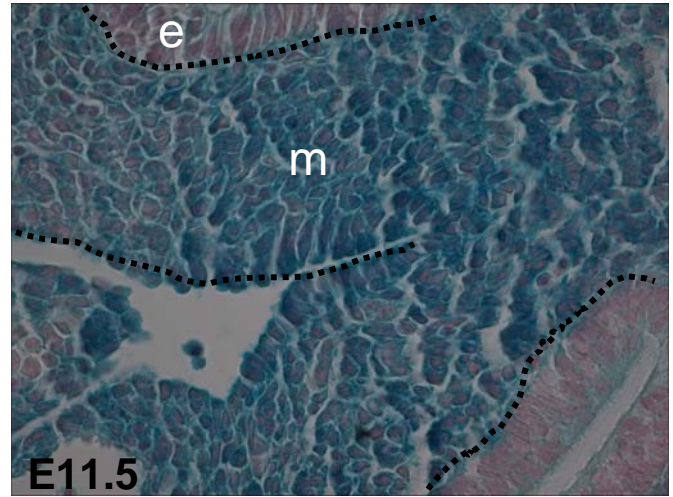

Supplemental Figure 3

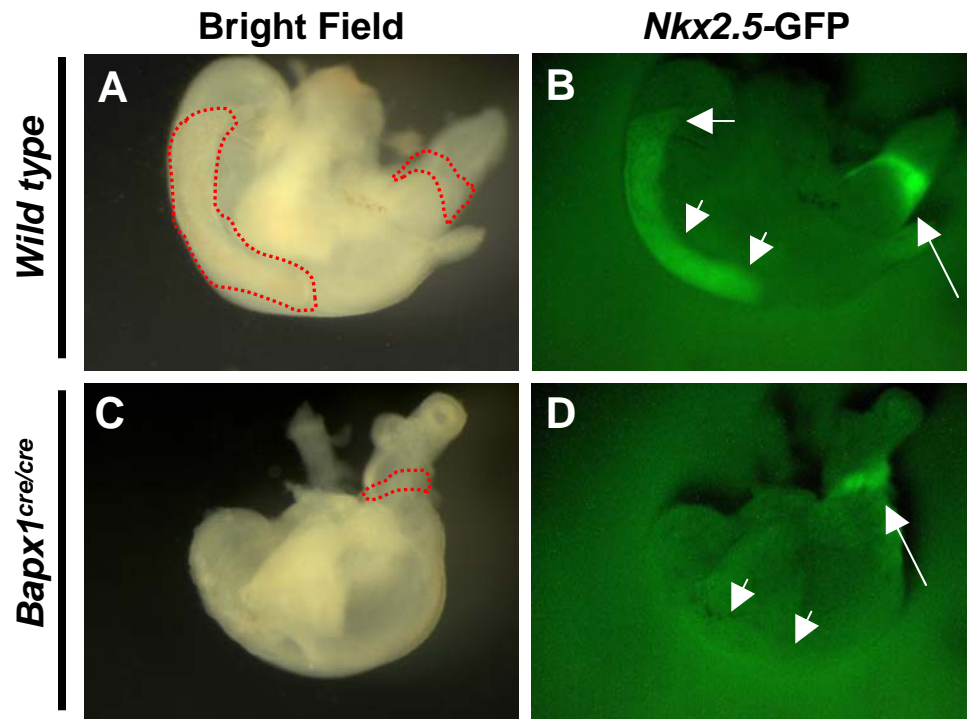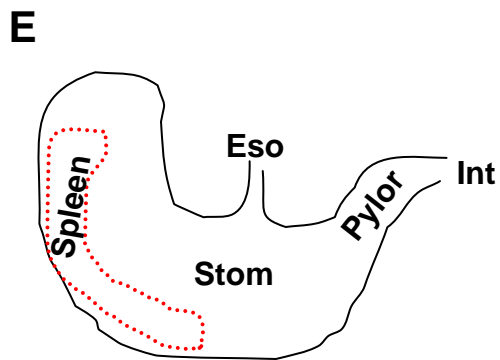

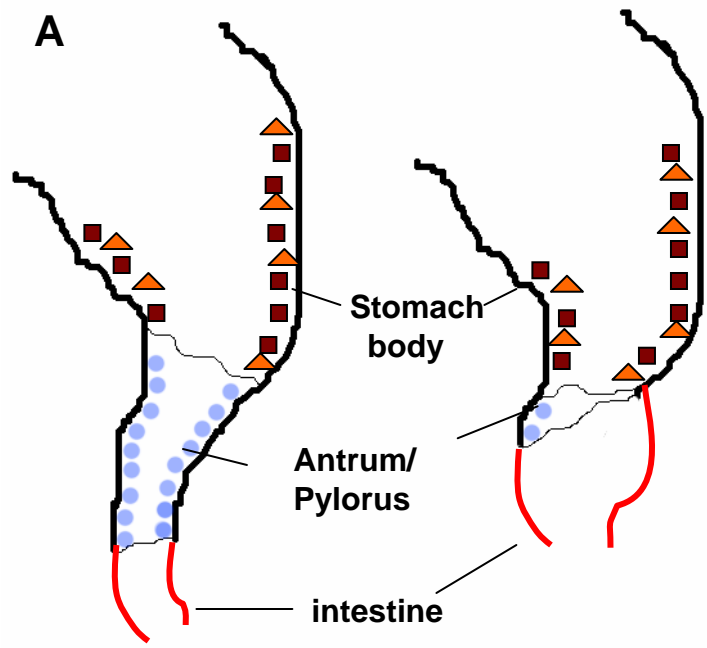

*Wild type*

*Bapx1<sup>cre/cre</sup>*

- H/K-ATPase
- Intrinsic Factor
- Alcian Blue
- Stomach
- Intestine

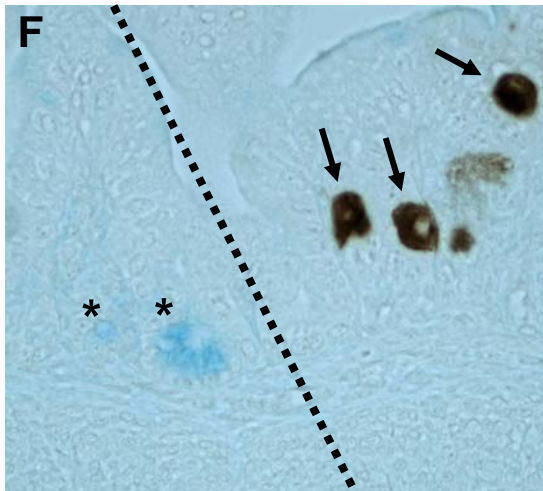

**Intrinsic Factor**

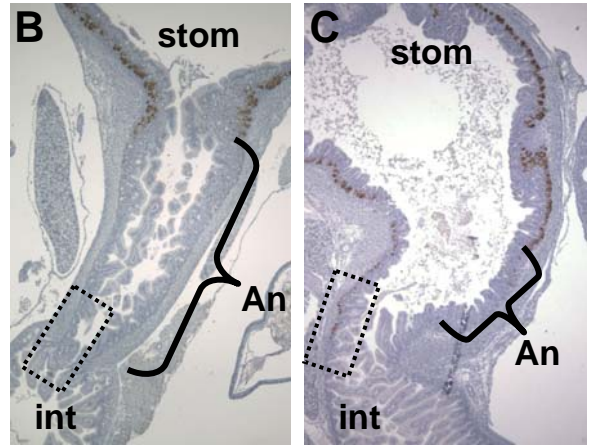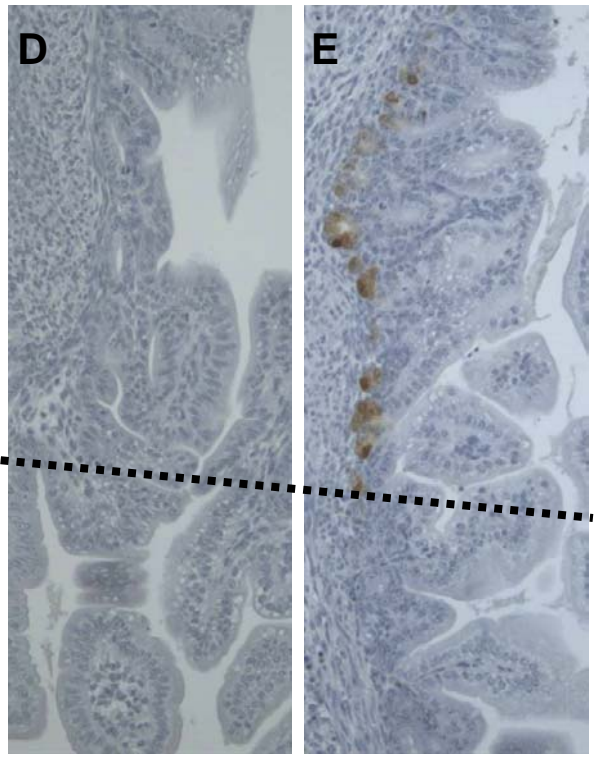

*Wild type*

*Bapx1<sup>cre/cre</sup>*

**A**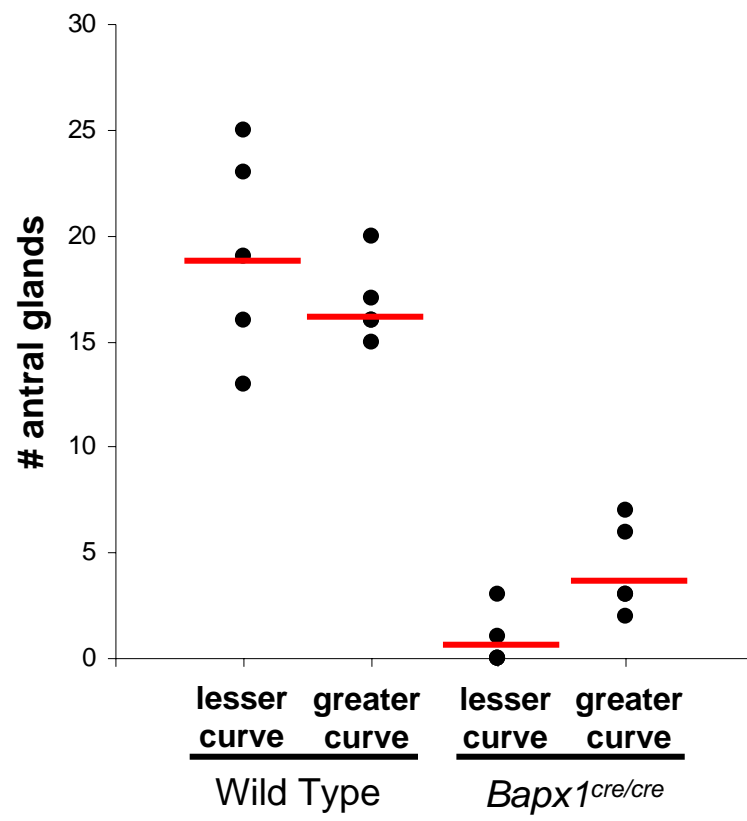**B**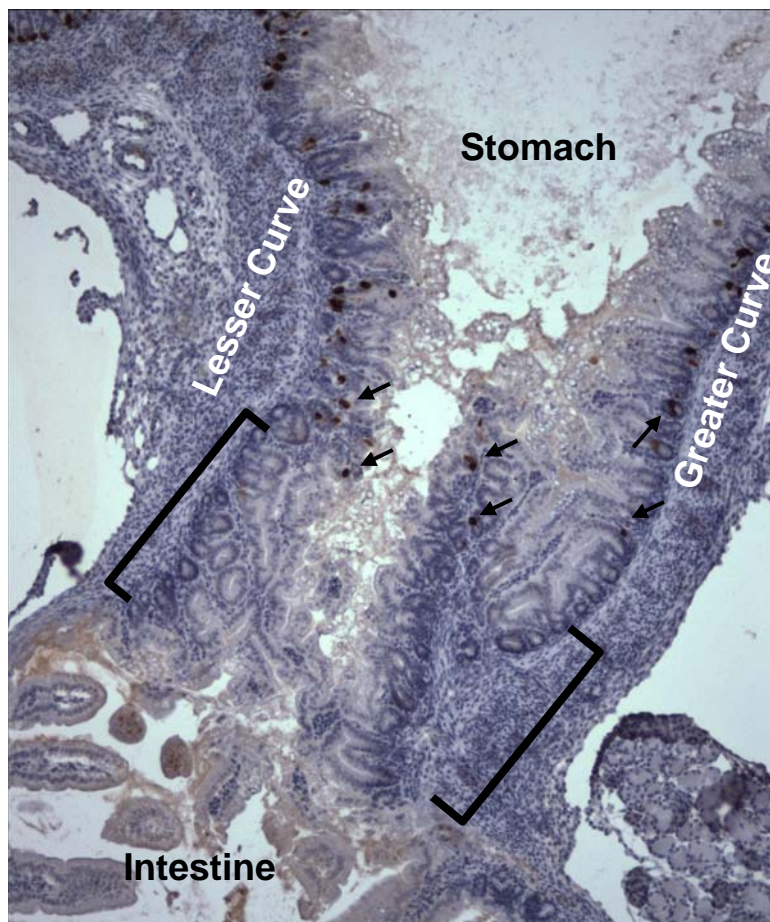

**A**

| ACCN#       | Symbol     | Fold change:<br>(log <sub>2</sub> ) | Name                                                 |
|-------------|------------|-------------------------------------|------------------------------------------------------|
| NM_007423.2 | Afp        | 2.82                                | alpha fetoprotein (Afp)                              |
| NM_009654.1 | Alb1       | 5.80                                | Albumin 1                                            |
| BC015262.1  | H/K-ATPase | 2.81                                | ATPase, H+/K+ transporting, alpha polypeptide        |
| NM_007526.1 | Barx1      | 1.06                                | BarH-like homeobox 1 (Barx1)                         |
| NM_009883.1 | Cebpb      | -1.21                               | CCAAT/enhancer binding protein (C/EBP), beta (Cebpb) |
| NM_010196.1 | Fga        | 3.52                                | Fibrinogen, alpha polypeptide                        |
| NM_181849.1 | Fgb        | 3.58                                | Fibrinogen, B beta polypeptide                       |
| NM_133862.1 | Fgg        | 3.80                                | Fibrinogen, gamma polypeptide                        |
| NM_008118.2 | Gif        | 3.32                                | Gastric intrinsic factor (Gif)                       |
| NM_181729.1 | Muc6       | -1.90                               | Mucin 6, Gastric (Muc6)                              |
| BQ560729.1  | Ptch1      | -1.21                               | Patched homolog 1                                    |
| NM_011448.2 | Sox9       | -1.35                               | SRY-box containing gene 9 (Sox9)                     |
| AW047257.1  | Wnt4       | 1.37                                | Wingless-related MMTV integration site 4             |

**B**

| Tissue | DE Genes | % Up | Upregulated GO Groups (p<0.005)                                                                                                                                                                                         | Downregulated GO Groups (p<0.005)                                         |
|--------|----------|------|-------------------------------------------------------------------------------------------------------------------------------------------------------------------------------------------------------------------------|---------------------------------------------------------------------------|
| PS     | 449      | 43%  | Blood Coagulation<br>Epithelial to Mesenchymal Transition<br>Fibrinogen complex<br>Regulation of Blood Pressure<br>Hemoglobin Binding<br>Humoral Immune Response<br>Polysaccharide Binding<br>Regulation of Endocytosis | Smad Binding<br>Protein-nucleus Import, Translocation<br>Vesicle Membrane |
